# Supplementary material
Source: HighWire-hosted journal article supplement (doi:10.1101/rna.042572.113)
Supplement: Lioy024572_Supplemental_TABLE_S1.docx [file Lioy024572_Supplemental_TABLE_S1.docx]

**TABLE S1.** Bacterial strains and plasmids used

| Strain or plasmid | Relevant propertiesa | Referenceb or source |
| --- | --- | --- |
| Strains |  |  |
| MM294 | F– *endA1 hsdR17* (rK–mK+) *glnV44 thi-1* | Bachmann 1972 |
| MM294∆*rsmF* | MM294 ** | This work |
| MM294∆*araB* | MM294 *araB* | This work |
| MM294∆*rsmF∆araB* | MM294**** and *araB* | This work |
| BW25113 | lacIq rrnBT14 ΔlacZWJ16 hsdR514 ΔaraBADAH33ΔrhaBADLD78 | Baba et al. 2006 |
| BW25113∆*rsmI* | BW25113 knockout for rsmI (CmR) | Kimura and Suzuki 2010 |
| BW25113∆*rsmH* | BW25113 knockout for rsmH (KmR) | Baba et al. 2006 |
| BW25113∆*rsmH∆rsmI* | BW25113 knockout for rsmH and rsmI (KmR, CmR) | Kimura and Suzuki 2010 |
|  |  |  |
| Plasmids |  |  |
| pIP1204 | IncL/M Tra+ (ApR CfR SpR SuR TpR 4,6-ddsR) | Galimand et al. 2003 |
| pIP1204∆*armA* | IncL/M Tra+ (ApR CfR SpR SuR TpR) | This work |
| pGB2 | *Ori* pSC101 *aad3”9* (SmR SpR) | Churchward et al. 1984 |
| pGB2Ω*ParmA* | pGB2Ω*ParmAgfpmut1* (SmR SpR) | This work |
| pGB2Ω*PnpmA* | pGB2Ω*PnpmAgfpmut1* (SmR SpR) | This work |
| pGB2Ω*armA* | pGB2Ω*ParmAarmA* (SmR SpR 4,6-ddsR) | This work |
| pGB2Ω*armA** | pGB2Ω*ParmAarmA** (SmR SpR ) | This work |
| pGB2Ω*npmA* | pGB2Ω*Pnpm*A*npmA* (SmR SpR 4,6-, 4,5-ddsR) | This work |
| pGB2Ω*npmA** | pGB2Ω*PnpmAnpmA** (SmR SpR) | This work |
| pQE-Luc (AUG) | *Ori* pBR322 *PT5* *Renilla luciferase-Firefly luciferase-AUG* (ApR) | Kimura and Suzuki 2010 |
| pQE-Luc (AUU) | *Ori* pBR322 *PT5* *Renilla luciferase-Firefly luciferase-AUU* (ApR) | Kimura and Suzuki 2010 |
| pQE-Luc (+1) | *Ori* pBR322 *PT5* *Renilla luciferase-Firefly luciferase-+1* (ApR) | Kimura and Suzuki 2010 |
| pQE-Luc (UGA) | *Ori* pBR322 *PT5* *Renilla luciferase-Firefly luciferase-UGA* (ApR) | Kimura and Suzuki 2010 |
| p1500 | pSU18ΩTcR-FRT(CmR, TcR) | D. Mazel unpublished |
| pKOBEG | pSC101 ts Ω*PBAD* red (CmR) | Chaveroche et al. 2000 |
| pKOBEGA | pSC101 ts Ω*PBAD* red (ApR) | Chaveroche et al. 2000 |
| pCP20 | pSC101 ts Ωλ*PR flp* (ApR, CmR) | Cherepanov and Wackernagel 1995 |

a Resistance to ApR, ampicillin; CfR, cefotaxime; CmR, chloramphenicol; KmR, kanamycin; SmR, streptomycin; SpR, spectimonycin; SuR, sulfonamide; TcR, tetracycline; TpR, trimethoprim; 4,5-ddsR, 4,5-disubstituted deoxystreptamines; 4,6-ddsR, 4,6-disubstituted deoxystreptamines; *flp*, flipase gene, FRT, flipase recognition target sites.

**b** References

Baba T, Ara T, Hasegawa M, Takai Y, Okumura Y, Baba M, Datsenko KA, Tomita M, Wanner BL, Mori H. 2006. Construction of *Escherichia coli* K-12 in-frame, single-gene knockout mutants: the Keio collection. *Mol Syst Biol* **2:** 2006 0008.

Bachmann BJ. 1972. Pedigrees of some mutant strains of *Escherichia coli* K-12. *Bacteriol Rev* **36:** 525-557.

Chaveroche MK, Ghigo JM, d'Enfert C. 2000. A rapid method for efficient gene replacement in the filamentous fungus *Aspergillus nidulans*. *Nucleic Acids Res* **28**: E97.

Cherepanov PP, Wackernagel W. 1995. Gene disruption in *Escherichia coli*: TcR and KmR cassettes with the option of Flp-catalyzed excision of the antibiotic-resistance determinant. *Gene* **158:** 9-14.

Churchward G, Belin D, Nagamine Y. 1984. A pSC101-derived plasmid which shows no sequence homology to other commonly used cloning vectors. *Gene* **31:** 165-171.

Galimand M, Courvalin P, Lambert T. 2003. Plasmid-mediated high-level resistance to aminoglycosides in *Enterobacteriacea*e due to 16S rRNA methylation. *Antimicrob Agents Chemother* **47:** 2565-2571.

Kimura S, Suzuki T. 2010. Fine-tuning of the ribosomal decoding center by conserved methyl-modifications in the *Escherichia coli* 16S rRNA. *Nucleic Acids Res* **38:** 1341-13.
