# Supplementary material
Source: HighWire-hosted journal article supplement (doi:10.1101/rna.042572.113)
Supplement: Lioy024572_Supplemental_TABLE_S2.docx [file Lioy024572_Supplemental_TABLE_S2.docx]

**TABLE S2**. Oligodeoxynucleotides usedin this study

| Primers | 5’-3’ sequencea | Purpose |
| --- | --- | --- |
| ∆rsmF P1 | aGCGTTTATGCTAAACTgcgcgcctGtttTtttgccagtggtacatgctc*CAGCTATGACCATGATTACG* | Upstream from *rsmF* for deletion |
| ∆rsmF P2 | aGGCAGCCGAATGTGCCAGTCAAAAagtgcgctttttttgtgcgctgtca*TTGTAAAACGACGGCCAGTG* | Downstream from *rsmF* for deletion |
| ∆rsmF up | ATTCACCGTGTAATTCGCCGTCG | PCR control of *rsmF* deleted |
| ∆rsmF down | AAACACTTCCTGTTGCAGGAAAG | PCR control of *rsmF* deleted |
| ∆armA P1 | AACCCGAAATGACAGTTCCTATCAAATACTTAACTTGTAGGTTCTTTCAA*cagctatgaccatgattacg* | Upstream from *armA* for deletion |
| ∆armA P2 | TGGACAGAGTTTAGTACTTTTCCAAGAAAATGAGTGCCTTGGAGGCGGAG*ttgtaaaacgacggccagtg* | Downstream from *armA* for deletion |
| ∆armA up | GGACTGGAATTACACTTCTTAGAG | PCR control of *armA* deleted |
| ∆armA down | TATCCGTTATAGAAGTCAGGATAC | PCR control of *armA* deleted |
| armA For | CGAATGAAAGAGTCGCAACA | qRT-PCR *armA* |
| armA rev | GCTGTTTTAGCACAGGAAGCA | qRT-PCR *armA* |
| rpoB For | CCTGTTCTTCTCCGAAGAC | qRT-PCR *rpoB* |
| rpoB rev | GGGTATCCAGATCGCCCA | qRT-PCR *rpoB* |

a The 20 nucleotides from plasmid p1500 are in italics
