# Supplementary material
Source: HighWire-hosted journal article supplement (doi:10.1101/rna.042572.113)
Supplement: SuppLegends.docx [file SuppLegends.docx]

**SUPPLEMENTARY MATERIALS**

**Aminoglycoside resistance 16S rRNA methyltransferases block endogenous methylation, affect translation efficiency and fitness of the host**

VIRGINIA S. LIOY, SYLVIE GOUSSARD, VINCENT GUERINEAU, EUN-JEONG YOON, PATRICE COURVALIN, MARC GALIMAND, and CATHERINE GRILLOT-COURVALIN

**Figure Legends**

**Figures S1 to S4**

**Tables S1, S2 and References**

**FIGURE S1**. MALDI-MS analysis of ArmA methylation in 16S rRNA fragment C1378-G1432. (*A*) Spectrum of RNase T1 rRNA from *E. coli* BW25113/pGB2. The empirical *m/z* values are given above the peaks and match the theoretical masses (see below) to within 0.1 Da. (B) Spectrum from BW25113/pGB2*armA* showing that fragments at *m/z* 1305 and 3195 are missing and fused in the fragment at *m/z* 4483. (*Inset*) Enlargement of the spectral region around *m/z* 4483. (*C*) Spectrum of RNase T1 rRNA from *E. coli* BW25113∆*rsmH*/pGB2 and (*D*) from BW25113 ∆*rsmH*/pGB2*armA* showing that fragments at *m/z* 1291 and 3195 are missing and fused in the fragment at *m/z* 4455 and 4469. (*Inset*) Enlargement of the spectral region around *m/z* 4460. (*E*) Spectrum of RNase T1 rRNA from *E. coli* BW25113∆*rsmI∆rsmHI*pGB2 and (*F*) BW25113∆*rsmI∆rsmH*/pGB2*armA* showing that fragments at *m/z* 1277 and 3195 are missing and fused in the fragment at *m/z* 4455 and 4469. (*Inset*) Enlargement of the spectral region around *m/z* 4460. (*G*) Spectrum of RNase T1 rRNA from *E. coli* BW25113∆*rsmI*/pGB2. (*H*) Theoretical masses of the monoisotopic *E. coli* fragments with 3’-linear phosphate (p). Only fragments that are tetranucleotides and larger are shown. An incidental observation: in (*D*) and (*F*) peaks at *m/z* 4455 corresponding to the C1402-G1415 sequence with a single methyl group indicated that ArmA methylation at G1405 was complete since RNase T1 cleavage was prevented but modification at C1407 was slightly less than stoichiometric

**FIGURE S2**. MALDI-MS analysis of ArmA methylation in 16S rRNA fragment C1378-G1432. (*A*) Spectrum of RNase T1 rRNA from *E. coli* BW25113∆*rsmI/*pGB2Ω*armA*. The empirical *m/z* values are given above the peaks and match the theoretical masses (see below) to within 0.1 Da. (*Inset*) Enlargement of the spectrum around *m/z* 4480. (*B*) Theoretical masses of the monoisotopic *E. coli* fragments with 3’-linear phosphate (p). Only fragments that are tetranucleotides and larger are shown.

**FIGURE S3**. MALDI-MS analysis of NpmA methylation in 16S rRNA fragment C1378-G1432. (*A*) Spectrum of RNase T1 rRNA from *E. coli* MM294∆*rsmF*/pGB2*npmA*. The empirical *m/z* values are given above the peaks and match the theoretical masses (see below) to within 0.1 Da. (*B*) Spectrum of RNase T1 rRNA from the *E. coli* MM294/pGB2*npmA**. (*C*) Theoretical masses of the monoisotopic *E. coli* fragments with 3’-linear phosphate (p). Only fragments that are tetranucleotides and larger are shown.

**FIGURE S4**. MALDI-MS analysis of ArmA methylation in 16S rRNA fragment C1378-G1432. (*A*) Spectrum of RNase T1 rRNA from *E. coli* MM294/pIP1204. The empirical *m/z* values are given above the peaks and match the theoretical masses to within 0.1 Da. (*Inset*) Enlargement of the spectrum around *m/z* 4490. (*B*) Spectrum of RNase T1 rRNA from *E. coli* MM294∆rsmF/pIP1204. (*Inset*) Enlargement of the spectrum around *m/z* 4470. (*C*) Theoretical masses of the monoisotopic *E. coli* fragments with 3’-linear phosphate (p). Only fragments that are tetranucleotides and larger are shown.
